# Supplementary material
Source: PubMed Central journal article supplement (PMC1890525)

## Alzheimer's disease (AD)

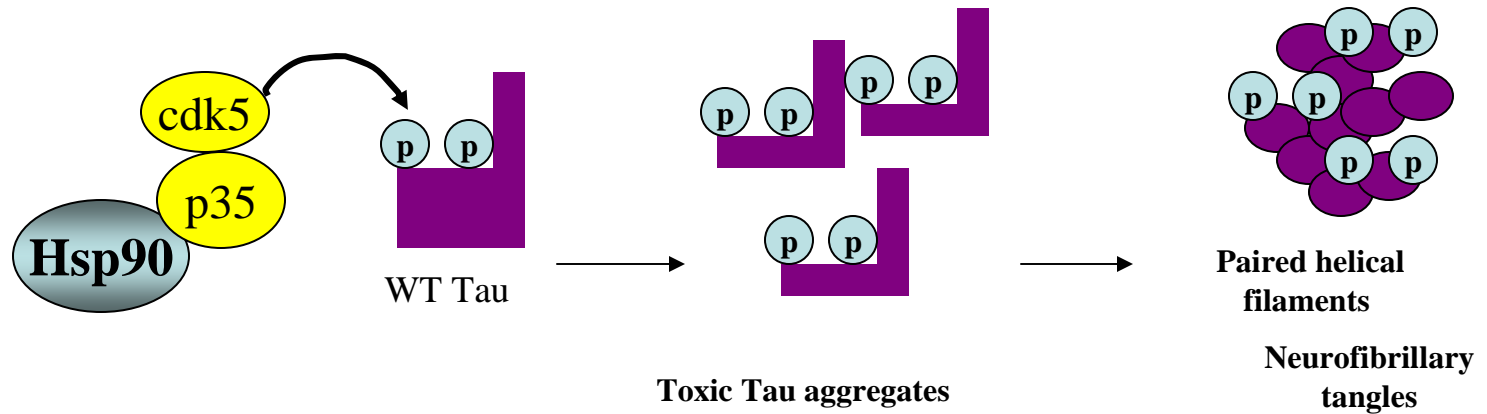

## Frontotemporal dementia and parkinsonism linked to chromosome 17 (FTDP-17)

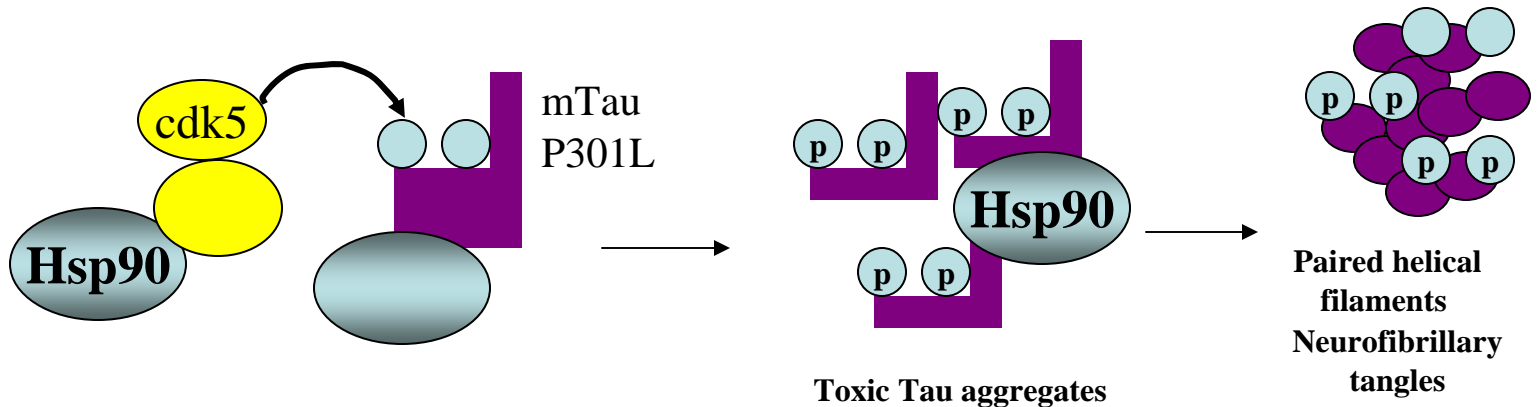

Supplement: pnas_0701055104_1.pdf [file pnas_0701055104_1.pdf]

**a**

p35

Hsp70

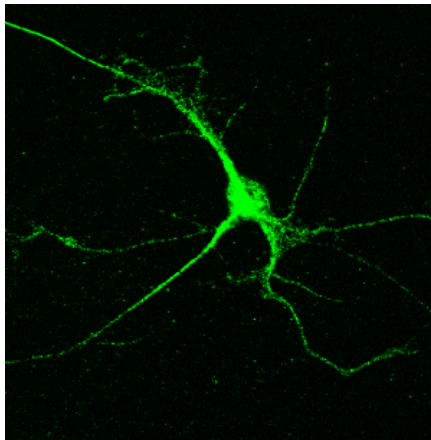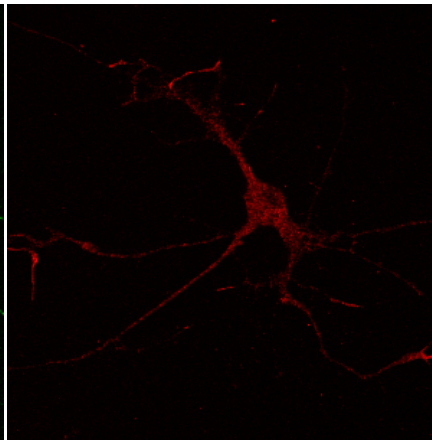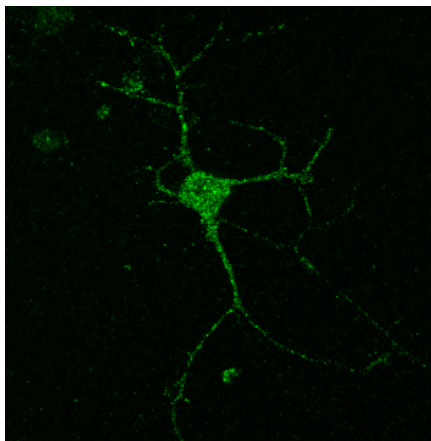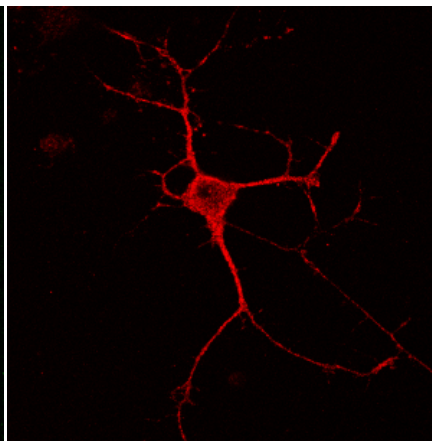**b**

p35

AT8 (P-S202/T205)

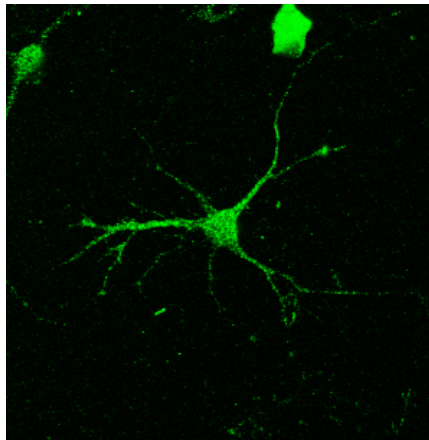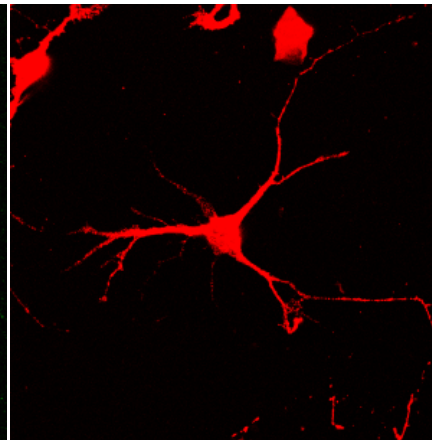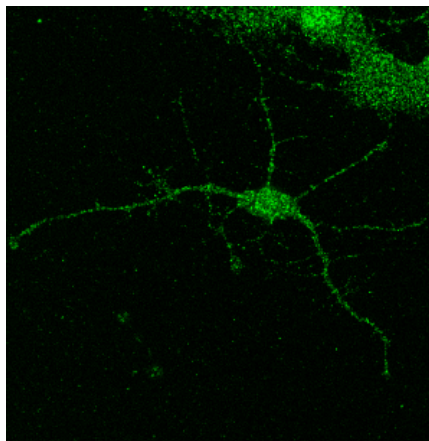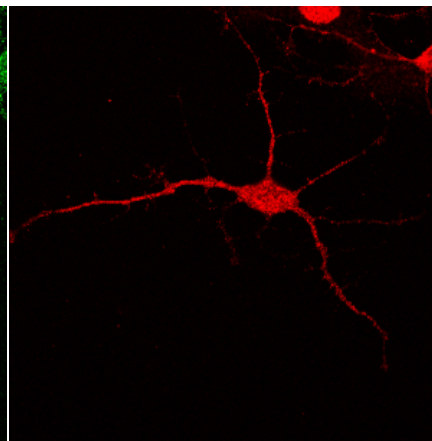**DMSO****PU24FCI**

Supplement: pnas_0701055104_2.pdf [file pnas_0701055104_2.pdf]

**a**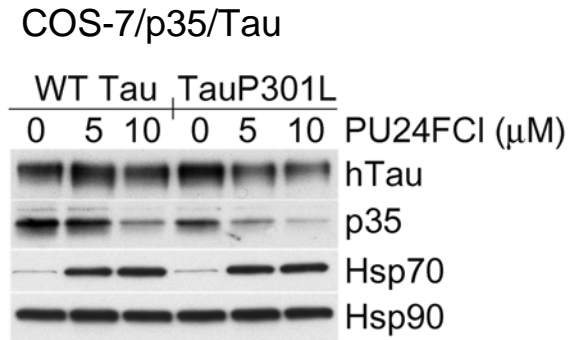**b**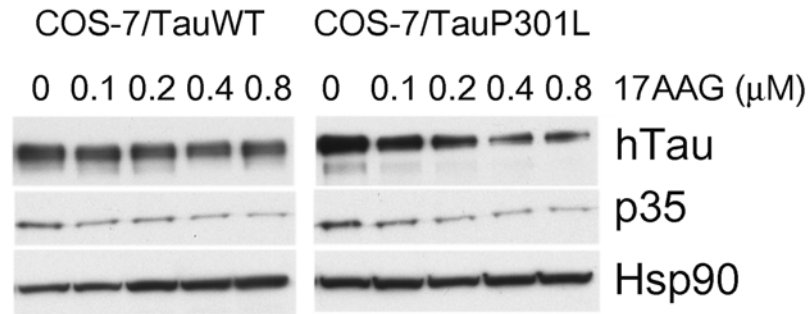

Supplement: pnas_0701055104_3.pdf [file pnas_0701055104_3.pdf]

**a**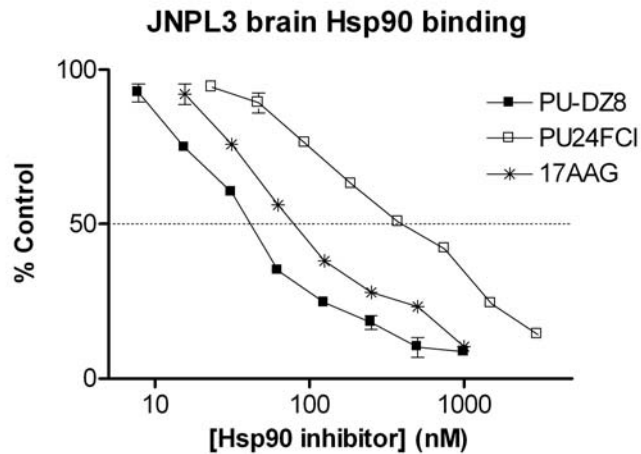**b**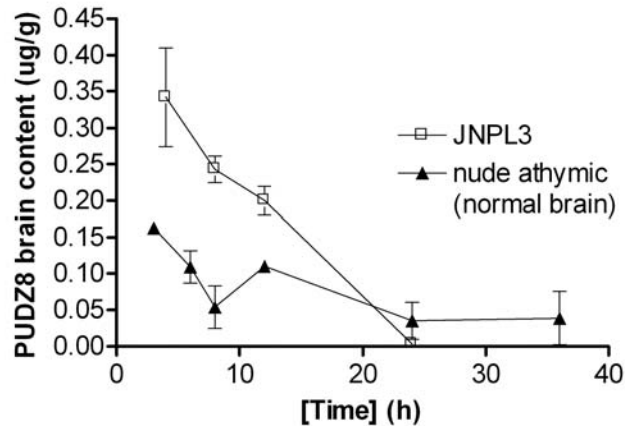

Supplement: pnas_0701055104_4.pdf [file pnas_0701055104_4.pdf]

**a**

## Primary Neurons

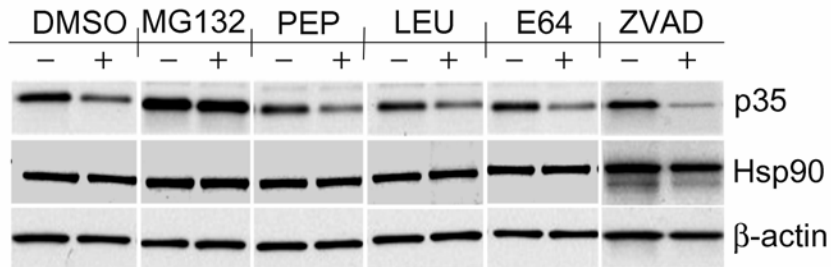**b**

## COS-7/Tau

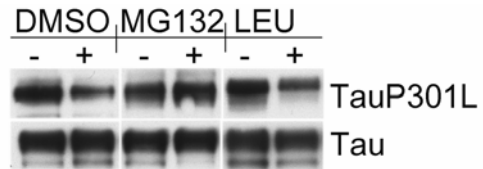

Supplement: pnas_0701055104_5.pdf [file pnas_0701055104_5.pdf]

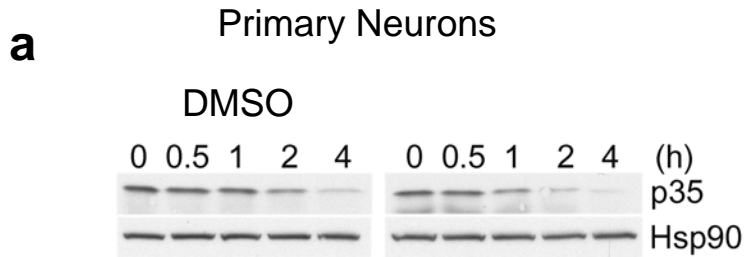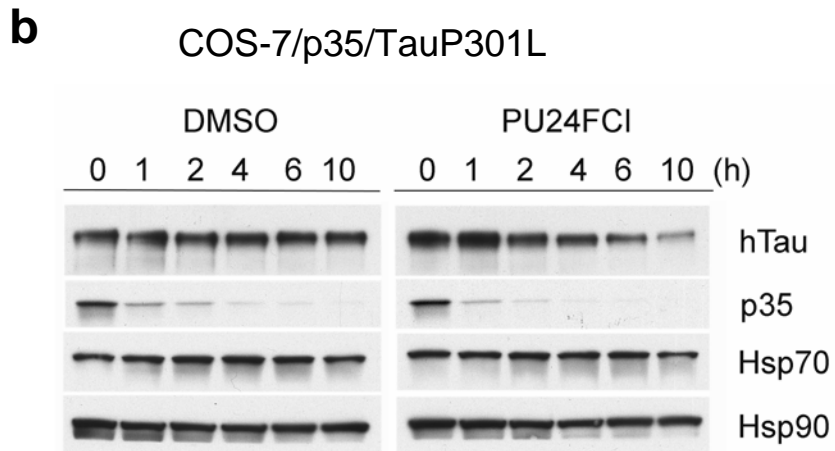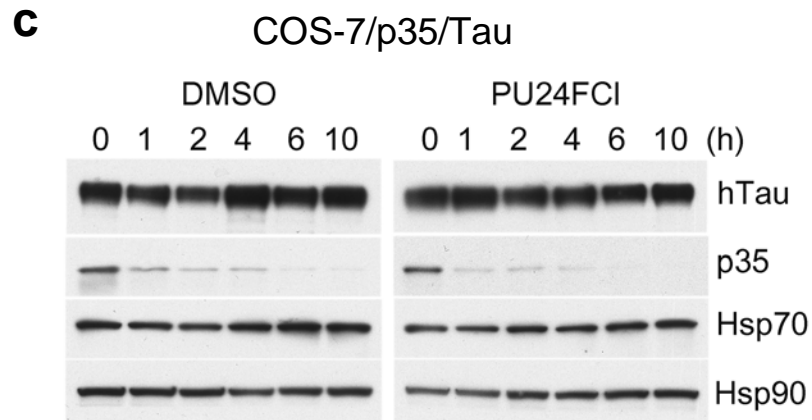

Supplement: pnas_0701055104_6.pdf [file pnas_0701055104_6.pdf]

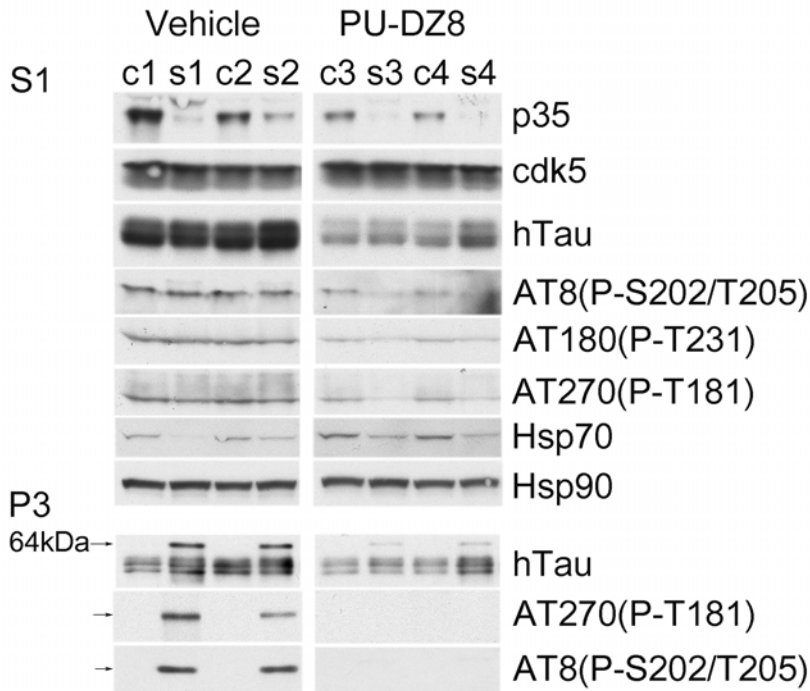

Supplement: pnas_0701055104_7.pdf [file pnas_0701055104_7.pdf]
